# Supplementary material
Source: publisher figshare collection journal article supplement (https://karger.figshare.com/ndownloader/files/30904564)
Supplement: Supplementary file 1 [file 30904564]

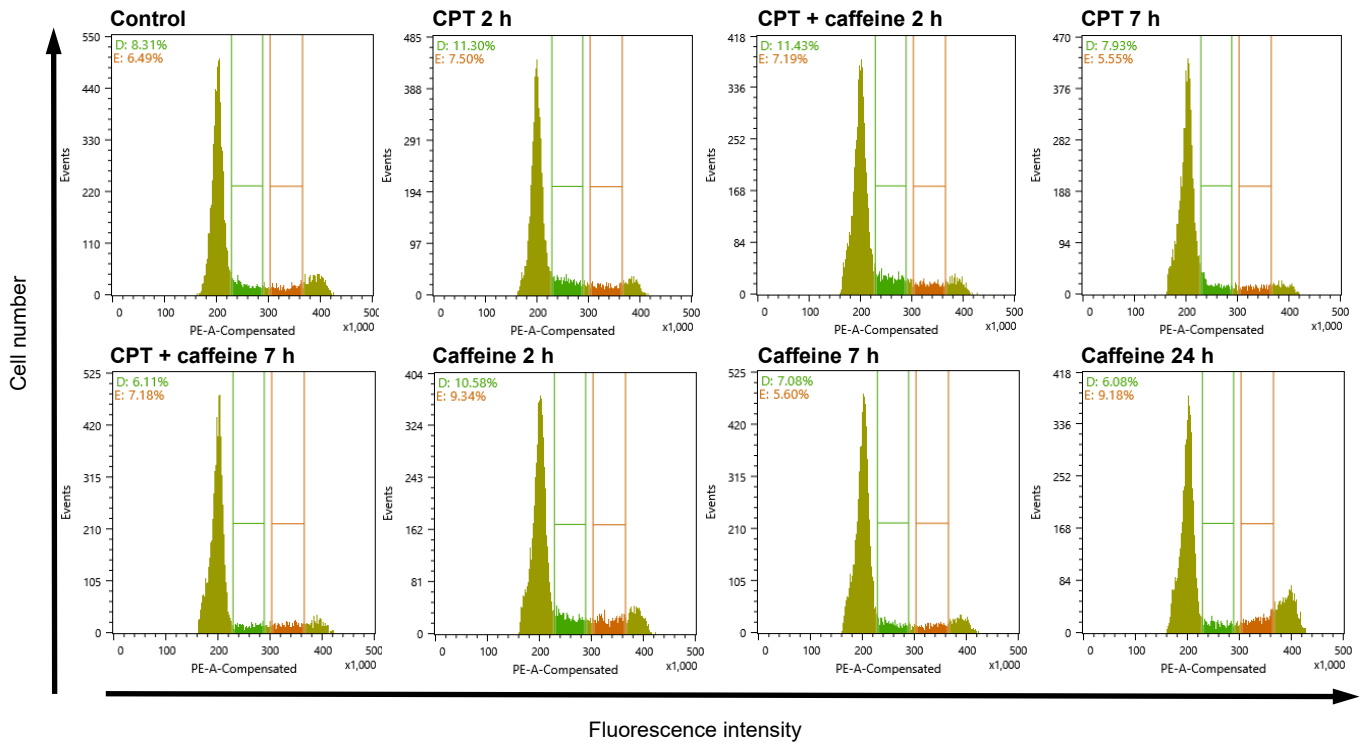

### Supplementary Figure 1

FACS cell cycle profiles of RPE cells from different treatments. Nuclear DNA was stained with 50  $\mu\text{g}/\text{mL}$  propidium iodide (PI) and RNA was digested with 100  $\mu\text{g}/\text{mL}$  RNase for 30 min after ethanol fixation. The DNA content was flow cytometrically analyzed. The x- and y-axes in the FACS charts represent the fluorescence intensity of PI and the cell number, respectively. Cell sorting gates used for sorting early and late S-phase fractions are shown as green and red areas in each FACS profile before sorting. The numbers in the upper left corner of each FACS charts show the percentage of cells in the gated areas.
